---

# Stone Diseases

Guest Editors:

D. Hauri, Zürich

O. Schmucki, Luzern

59 figures, 2 color plates, 22 tables, 1986

---

S. Karger · Medical and Scientific Publishers · Basel · München · Paris · London · New York · New Delhi · Singapore · Tokyo · Sydney

---

#### Drug Dosage

The authors and the publisher have exerted every effort to ensure that drug selection and dosage set forth in this text are in accord with current recommendations and practice at the time of publication. However, in view of ongoing research, changes in government regulations, and the constant flow of information relating to drug therapy and drug reactions, the reader is urged to check the package insert for each drug for any change in indications and dosage and for added warnings and precautions. This is particularly important when the recommended agent is a new and/or infrequently employed drug.

All rights reserved.

No part of this publication may be translated into other languages, reproduced or utilized in any form or by any means, electronic or mechanical, including photocopying, recording, microcopying, or by any information storage and retrieval system, without permission in writing from the publisher or, in the case of photocopying, direct payment of a specified fee to the Copyright Clearance Center (see 'Information for Readers and Subscribers').

© Copyright 1986 by S. Karger AG, P.O. Box, CH-4009 Basel (Switzerland)  
Printed in Switzerland by Thür AG Offsetdruck, Pratteln  
ISBN 3-8055-4523-1

## Contents

|                                                                                        |     |
|----------------------------------------------------------------------------------------|-----|
| Editorial                                                                              | 325 |
| Considerations on the History Lithogenesis                                             |     |
| Puigvert, A.                                                                           | 327 |
| Pathophysiology of Stone Formation                                                     |     |
| Robertson, W.G.                                                                        | 329 |
| Critical Aspects of Urine and Stone Analysis. Appearance of Iatrogenic Urinary Calculi |     |
| Asper, R.; Schmucki, O.                                                                | 334 |
| Clinical Significance of Stone Analysis                                                |     |
| Schmucki, O.; Asper, R.                                                                | 343 |
| Clinical Aspects of Stone Formation and Conservative Treatment                         |     |
| Ulshöfer, B.                                                                           | 348 |
| Extracorporeal Shock Wave Lithotripsy                                                  |     |
| Jocham, D.; Chaussy, C.; Schmiedt, E.                                                  | 357 |
| Ureterorenoscopy in the Treatment of Ureteral Stones (with 2 color plates)             |     |
| Bichler, K.-H.; Halim, S.                                                              | 369 |
| Percutaneous Litholapaxy                                                               |     |
| Korth, K.; Bernius, U.                                                                 | 375 |
| Surgical Therapy                                                                       |     |
| Hauri, D.                                                                              | 385 |
| Rational Prevention of Calcium Urolithiasis                                            |     |
| Butz, M.                                                                               | 387 |
| Mild Metabolic Hyperoxaluria and Its Response to Pyridoxine                            |     |
| Gill, H.S.; Rose, G.A.                                                                 | 393 |
